# Supplementary material for: Yorkie is required to restrict the injury responses in planarians
Source: PLoS Genet. 2017 Jul 7;13(7):e1006874. doi: 10.1371/journal.pgen.1006874 (PMC5515462; doi:10.1371/journal.pgen.1006874)
Supplement: S2 Table — (XLSX) [file pgen.1006874.s009.xlsx]

## Sheet: Sheet1
	yki(RNAi) 6 hpa compared to control(RNAi) 6 hpa		yki(RNAi) 12 hpa compared to control(RNAi) 12 hpa		yki(RNAi) 24 hpa compared to control(RNAi) 24 hpa
Gene	p-value	FDR	p-value	FDR	p-value	FDR
axin2	9.38e-05	0.00236598	2.13e-25	1.61e-23	1.78338e-06	7.27619e-05
BMP4	0.257195	0.684428	2.21e-05	0.000257896	0.28466	0.711609
CTNNB1	0.0187544	0.153286	6.74e-07	1.05e-05	0.000395442	0.00787252
dd_13735	0.0933805	0.419913	0.0873365	0.272216	0.000939798	0.0155943
dd_15686	6.38e-15	1.78e-12	5.16e-15	1.99e-13	7.57116e-18	3.54821e-15
dd_4427	8.37e-09	7.34e-07	2.96e-10	7.19e-09	4.21344e-18	2.02948e-15
DNAJB13	0.0120503	0.112067	8.8e-13	2.81e-11	0.0303307	0.204484
wntless	0.13419	0.505893	0.0392944	0.152579	0.380206	0.799561
FAM160A1	0.00582374	0.0649392	0.0165875	0.0790077	8.26697e-05	0.00209074
glypican-1	0.0157158	0.135787	3.94e-09	8.45e-08	0.0133326	0.117759
ndl-5	4.22e-05	0.00119865	0.000288037	0.00259704	0.0626723	0.322953
netrin-2A	0.0352898	0.233214	0.0494656	0.181878	0.061786	0.319812
noggin-1	0.580603	0.897209	0.000663418	0.00542292	0.412774	0.820439
noggin-7	0.00269593	0.036003	4.02e-10	9.58e-09	0.0305314	0.205372
notum	0.0573236	0.31864	7.16e-11	1.86e-09	0.0397044	0.24334
sfrp-2	0.00266486	0.035799	5.49e-05	0.000585022	1.10661e-11	1.56004e-09
slit	1.36e-05	0.000457923	4.22e-12	1.25e-10	5.33754e-08	3.32924e-06
Fzd-4-3	0.0377836	0.244113	1.43e-05	0.000175678	0.000501586	0.00947876
Fzd-4-2	0.099267	0.431408	0.749827	0.899397	5.76877e-05	0.00152486
Fzd-4-4	0.000414141	0.00812476	0.000800072	0.00637072	0.0408309	0.24748
Fzd-5/8-1	0.397188	0.803662	0.000420999	0.00363445	0.302958	0.732167
frz-d	1.55e-11	2.59e-09	2.3e-19	1.21e-17	2.04321e-19	1.2217e-16
Hox4b	0.0155511	0.13491	0.0390433	0.151907	9.47717e-12	1.347e-09
Hox7b	3.43e-08	2.53e-06	2.78e-15	1.1e-13	4.01469e-23	4.35092e-20
Post-2c	2.66e-09	2.58e-07	0.0225399	0.100299	4.72859e-10	4.68536e-08
Post-2d	3.15e-11	4.78e-09	6.97e-22	4.26e-20	5.17143e-17	1.99272e-14
prep	0.0189574	0.154601	0.000937549	0.00728676	0.0916772	0.404912
tolloid	0.142867	0.524875	0.00488269	0.0293132	0.00520723	0.0594819
wnt1	0.000774502	0.0133919	0.238922	0.515436	0.518984	0.875188
wnt11-6	0.0167909	0.141705	0.00841573	0.0459899	6.92262e-06	0.000236762
wnt2-1	0.000946772	0.0156948	0.00736618	0.0412967	0.0608549	NA
wntP2	0.0240867	0.183208	0.000220336	0.00205181	0.00441363	0.0523836
wnt11-4	0.0170089	0.143011	0.000407729	0.00353554	2.22919e-05	0.000673417
